# Supplementary material
Source: PubMed Central journal article supplement (PMC3230705)
Supplement: NIHMS330253-supplement-supplement_1.pdf [file NIHMS330253-supplement-supplement_1.pdf]

## 1 ONLINE METHODS

2

3 **RNA construct design and preparation.** Templates for RNA mutants were cloned  
4 using QuikChange (Agilent) with ptetTELO as the template<sup>32</sup>. The cpRNA constructs  
5 were generated using two rounds of PCR with ptetTELO as the template and then  
6 inserted into pUC19; the sequence of the linker joining the natural 5' and 3' ends of  
7 TER is TTTTGGATCC<sup>15</sup>. RNA was synthesized by T7 RNA polymerase in run-off  
8 transcription of EarI-digested plasmids containing the template for TER, TER  
9 mutants or cpRNAs. Transcriptions ran overnight at 37 °C prior to hammerhead  
10 cleavage with 25 mM MgCl<sub>2</sub> at room temperature for 1 h. Samples were then  
11 ethanol precipitated prior to purification on a denaturing gel (6% v/v  
12 polyacrylamide, 7 M urea and 1X TBE). Purified RNAs were eluted and concentrated  
13 in 5 mM sodium cacodylate, pH 6.5.

14 **Construction of dye-labeled telomerase RNA.** Cy5-labeled telomerase RNA was  
15 constructed as described<sup>33</sup>. Briefly, synthesized RNA fragments harboring a site-  
16 specific reactive amine group (Dharmacon) were conjugated to amine-reactive Cy5  
17 (GE Lifesciences) and purified by reverse phase HPLC on a C8 column. Full-length  
18 telomerase RNAs were generated by DNA-splinted RNA ligation with T4 DNA ligase  
19 (NEB). Oligonucleotides used had the following sequences: TER 1-31 fragment 5'-  
20 AUACCCGCUAAUUCUAUCGAUCUGUAAUA, U36 TER 32-95 fragment 5'-P-GAAC[5-  
21 N-U]GUCAUUCACCCCAAAAUCUAGUGCUGAUUAACCUUCACCAAUUAGGUUCAA-  
22 AUAAG, U63 TER 32-95 fragment 5'-P-GAACUGUCAUUCACCCCAAAAUCUAG-  
23 UGC[5-N-U]GAUAUAACCUUCACCAAUUAGGUUCAAUAAG, TER 96-159 fragment 5'-  
24 P-UGGUA AUGCGGACAAAAGAC UAUCGACAUUUGAUACACUAUUUAUCAUUGGA-  
25 UGUCUUAUUUU, Stem III DNA Splint 5' TGTCCCGCATTACCACTTATTTGAACCTAA 3',  
26 Stem II DNA Splint 5' GTTGAATGACAGTTCTATTACAGATCTGAA 3'

27 **Telomerase reconstitution and immunoprecipitation.** Telomerase was  
28 reconstituted using the TnT Quick Coupled Transcription-Translation System  
29 (Promega) as previously described, with <sup>35</sup>S-methionine (Perkin Elmer) included for  
30 quantitation<sup>16,34</sup>. p65 was purified as previously described<sup>16</sup>. Final RNA and p65  
31 concentrations in the translation reactions were 400 nM and 2 μM, respectively.  
32 Assembled telomerase was immunoprecipitated with T7-tag antibody-conjugated  
33 agarose (Novagen). <sup>35</sup>S-methionine was quantitated using a scintillation counter,  
34 and all samples were diluted with 1x tTB (50 mM Tris-HCl, pH 8.3, 1.25 mM MgCl<sub>2</sub>, 5  
35 mM DTT)+ 30% v/v glycerol to normalize for the amount of <sup>35</sup>S-TERT.

36 PAGE purified full-length Cy5-labeled RNAs were pre-bound with  
37 recombinantly expressed and purified p65, and reconstituted in the TnT system  
38 with FLAG-labeled TERT. Telomerase reconstituted with dye-labeled RNA showed  
39 comparable activity to wild-type RNA as previously described<sup>19</sup>. Telomerase was  
40 purified by immunoprecipitation with anti-FLAG resin (Sigma) and eluted with  
41 FLAG peptide (Sigma) as described<sup>34</sup>.

42 **Direct telomerase activity assays.** Telomerase activity assays were performed as  
43 previously described<sup>16,34</sup>. After incubating for 1 h at 30 °C, reactions were stopped

1 with 3.6 M sodium acetate, pH 5.2, 1 mg glycogen and 2,000-6,000 counts of a  
2 recovery control (a 5'- end labeled and gel-purified 63-mer DNA oligonucleotide of  
3 random sequence), with the exception of the assays shown in Supplementary Fig.  
4 2b, which were incubated at 30 °C for 1.5 h to maximize signal. Reactions conducted  
5 at the same time received equal counts of recovery control.

#### 6 **Real time detection of telomerase binding to DNA primers by smFRET.**

7 smFRET-based telomerase binding assays were conducted as previously  
8 described<sup>22</sup>. Biotinylated primers (IDT) labeled at the n-2 alignment residue with  
9 Cy3 (GE Lifesciences) were immobilized on a quartz slide through a biotin-  
10 streptavidin linkage (biotinylated polyethylene glycol from Laysan Bio, streptavidin  
11 from Invitrogen). Telomeric primers used: D, Biotin – TGTGTGTGTGTGTGTG [5-  
12 Amino-C6-dT] TGGG; E, Biotin – TGTGTGTGTGTGTGTG [5-Amino-C6-dT] TGGGG; F,  
13 Biotin – TGTGTGTGTGTGTGTG [5-Amino-C6-dT] TGGGGT; A, Biotin –  
14 TGTGTGTGTGTGTGTG [5-Amino-C6-dT] TGGGGTT; B, Biotin –  
15 TGTGTGTGTGTGTGTG [5-Amino-C6-dT] TGGGGTTG.

16 Immunopurified telomerase complexes were flowed over immobilized  
17 primers in telomerase binding and imaging buffer (20 mM Tris pH 8.0, 5 mM MgCl<sub>2</sub>,  
18 10% w/v glucose, 10% v/v glycerol, 2 mM trolox, 1 μg ml<sup>-1</sup> catalase, and 1.5 mg ml<sup>-1</sup>  
19 glucose oxidase). Binding events were identified by anti-correlated changes in  
20 donor and acceptor dye fluorescence detected using a prism-type TIRF microscope  
21 and an Andor Ixon CCD camera using 100 ms integration time. FRET was measured  
22 over the course of the binding event using the formula  $E = 1/[1+\gamma(I_D/I_A)]$ , where E is  
23 FRET efficiency,  $I_D$  is donor intensity and  $I_A$  is acceptor intensity.  $\gamma$  is a factor that  
24 adjusts for differences in dye quantum yields, and can be useful in correcting FRET  
25 efficiency when there is a protein-induced Cy3 enhancement as was observed in a  
26 subset of our traces. Because we cannot distinguish between acceptor bleaching  
27 events and enzyme dissociation from the primer, we could not determine  $\gamma$  by the  
28 previously established method<sup>35</sup>. Instead, we approximated  $\gamma$  as  $(I_{D1} + I_{A1})/(I_{D2} + I_{A2})$   
29 where  $I_{D1} + I_{A1}$  represents the sum of the donor and acceptor intensity before  
30 protein binding and  $I_{D2} + I_{A2}$  represents the sum of the donor and acceptor  
31 intensities after binding.  $\gamma$  was determined individually for each trace and was  
32 consistent with previously reported values of protein-induced Cy3 enhancement<sup>35</sup>.  
33 There was no correlation between the mean dyesum intensity and the width of the  
34 FRET histogram in our experiments, demonstrating that differences in the widths of  
35 the FRET distributions are not due to variations in the signal intensity.

36 We do not know the extent to which the environment of the dye might hinder  
37 its rotational freedom, affecting the observed FRET efficiencies. We cannot measure  
38 dye anisotropy accurately, as any measurement would include signal from inactive  
39 or unbound complexes. For other systems, deviations in anisotropy values have not  
40 been observed to change the direction of the FRET efficiency trend<sup>36</sup>, and in our case  
41 it seems unlikely that such a photo-physical artifact would coincidentally give rise to  
42 the opposite changes in FRET that we observe for the two TER labeling sites.

43 Each experiment consisted of traces obtained from 40 200-second movies,  
44 which generated between 23-106 separate binding events. Binding event traces

1 were analyzed in Matlab (Mathworks) and each experiment was used to generate  
2 histograms consisting of all the FRET values observed at each time point over the  
3 course of all of binding events. Gaussian distributions were fit to the histograms to  
4 determine the center of the distribution. Plotting and fitting of the smFRET data was  
5 performed in Origin (Originlab). The experiment was repeated in triplicate for each  
6 primer permutation with both RNA labeling sites.

7 **Figure preparation.** Figures were generated in Adobe Illustrator.

8  
9 **Methods only references**

- 10  
11 32. Zaug, A.J. & Cech, T.R. Analysis of the structure of Tetrahymena nuclear RNAs  
12 in vivo: telomerase RNA, the self-splicing rRNA intron, and U2 snRNA. *RNA* **1**,  
13 363-74 (1995).
- 14 33. Akiyama, B.M. & Stone, M.D. Assembly of complex RNAs by splinted ligation.  
15 *Methods in enzymology* **469**, 27-46 (2009).
- 16 34. Bryan, T.M., Goodrich, K.J. & Cech, T.R. A mutant of Tetrahymena telomerase  
17 reverse transcriptase with increased processivity. *The Journal of biological*  
18 *chemistry* **275**, 24199-207 (2000).
- 19 35. Ha, T. et al. Single-molecule fluorescence spectroscopy of enzyme  
20 conformational dynamics and cleavage mechanism. *Proceedings of the*  
21 *National Academy of Sciences of the United States of America* **96**, 893-8  
22 (1999).
- 23 36. Roy, R., Hohng, S. & Ha, T. A practical guide to single-molecule FRET. *Nature*  
24 *methods* **5**, 507-16 (2008).
- 25  
26
